# Supplementary material
Source: Springer Nature journal article supplement (https://www.springermedizin.de/resource/supplementary/13034_2013_238_MOESM1_ESM.pdf/9652608)
Supplement: MOESM1 [file 9652608]

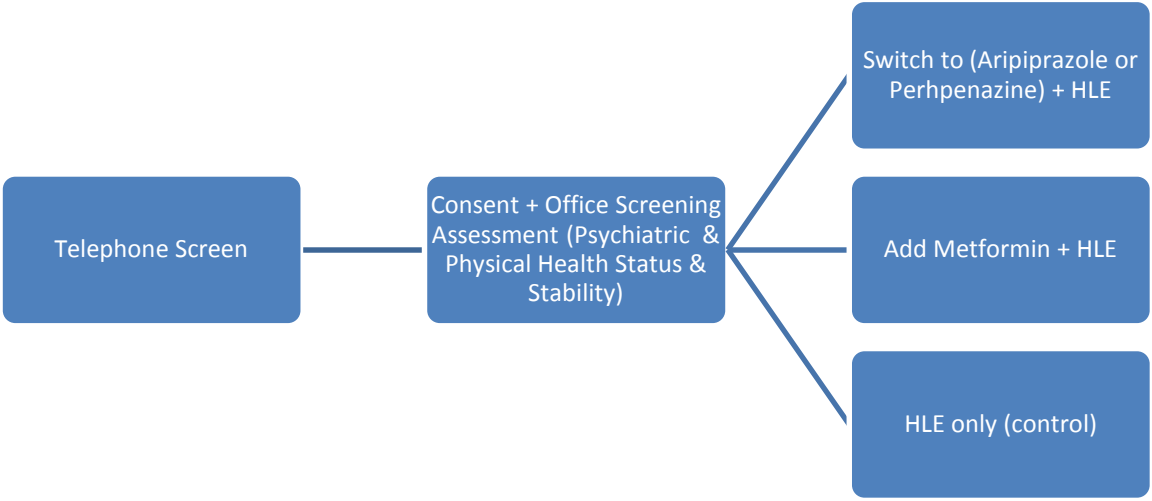

Telephone Screen

Consent + Office Screening Assessment (Psychiatric & Physical Health Status & Stability)

Switch to (Aripiprazole or Perhpenazine) + HLE

Add Metformin + HLE

HLE only (control)
